# Supplementary material for: BRM Complex in Arabidopsis Adopts ncBAF-like Composition and Requires BRD Subunits for Assembly and Stability
Source: MDPI journal article supplement (doi:10.3390/ijms24043917), 2023-02-15
Supplement: s1 [file s1]

## SUPPLEMENTAL FIGURES AND TABLES

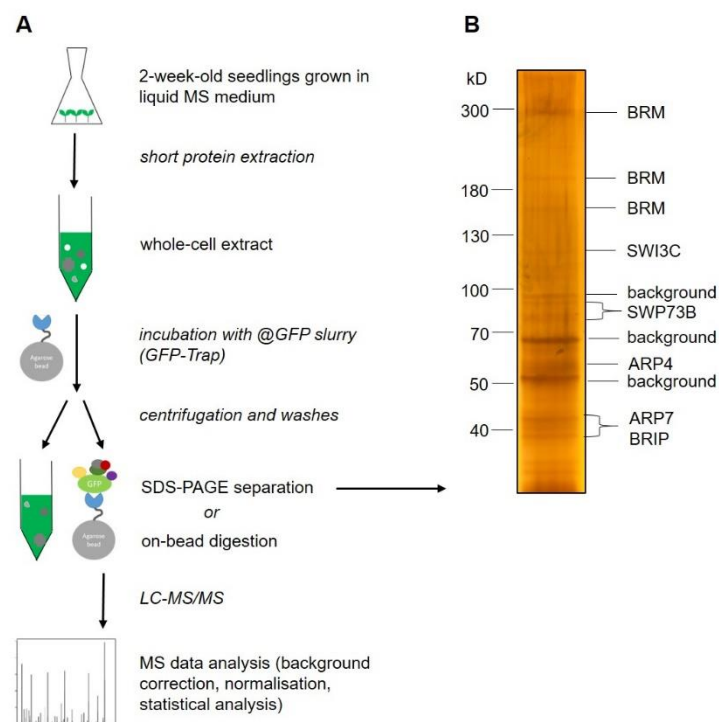

**Figure S1.** Isolation of SWI/SNF complexes from Arabidopsis seedlings. **(A)** Experimental setup of IP/MS analyses. **(B)** Silver-stained gel showing the proteins immunoprecipitated with BRM-GFP from the whole cell extracts of the *brm-1*/BRM-GFP line. Proteins were identified using LC-MS/MS.

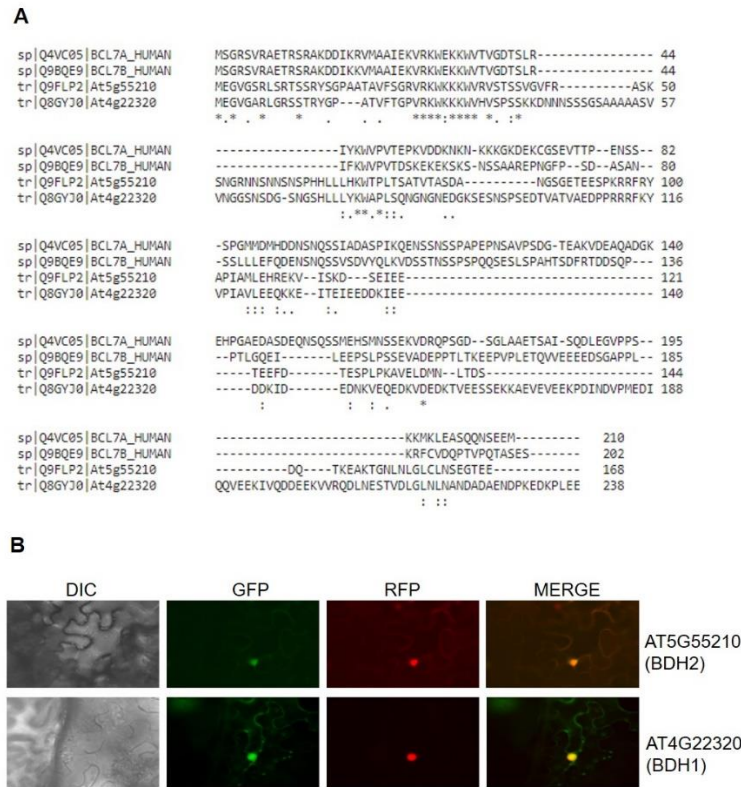

**Figure S2.** Analysis of the BCL7-like proteins AT4G22320 (BDH1) and AT5G55210 (BDH2). **(A)** Multiple sequence alignment of amino acid sequences of AT5G55210 and AT4G22320, as well as human BCL7A and BCL7B. Identical amino acids in all aligned sequences are marked with asterisks. **(B)** Nuclear localization of transiently expressed AT5G55210-GFP and AT4G22320-GFP fusions in tobacco epidermal cells examined by laser scanning confocal microscopy. Cells were co-transformed with H2B-RFP to visualize nuclei. DIC, differential interference contrast.

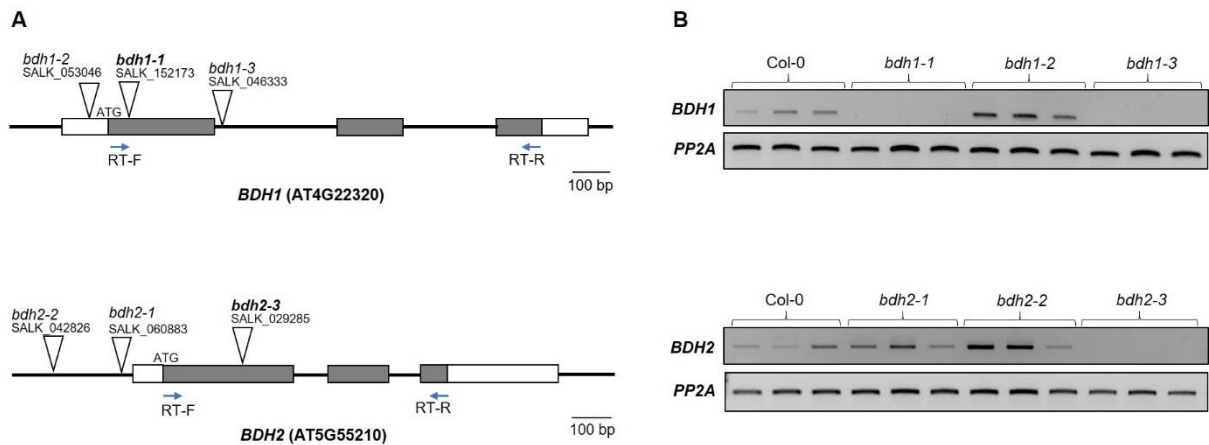

**Figure S3.** *BDH1* and *BDH2* mutant alleles. **(A)** Positions of T-DNA insertions in the *BDH1* and *BDH2* genes of mutant Arabidopsis lines. Arrows indicate positions of the primers used for RT-PCR. The mutant alleles used to generate double *bdh* mutants are bolded. **(B)** Full-length *BDH1* and *BDH2* transcripts detected by RT-PCR in wild-type and *bdh* mutants. Total RNA was isolated from 15-day-old seedlings grown under LD conditions, and the housekeeping gene *PP2A* was used as a control. Three biological replicates are shown for each line.

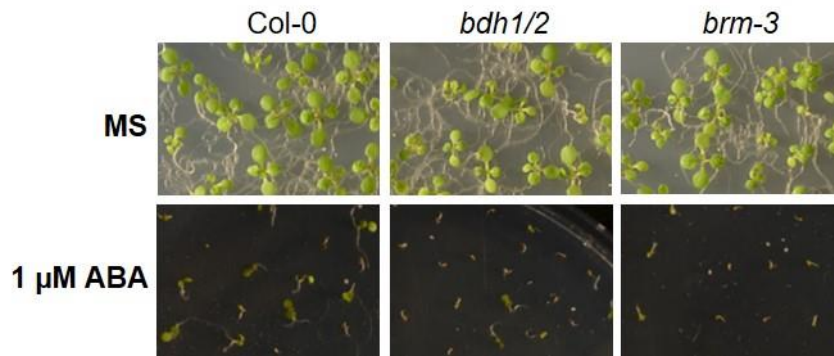

**Figure S4.** The *bdh1/2* double mutant shows hypersensitivity to ABA. Seedlings grown for x days on MS medium or in the presence of 1  $\mu$ M ABA are shown. Bar = 10 mm.

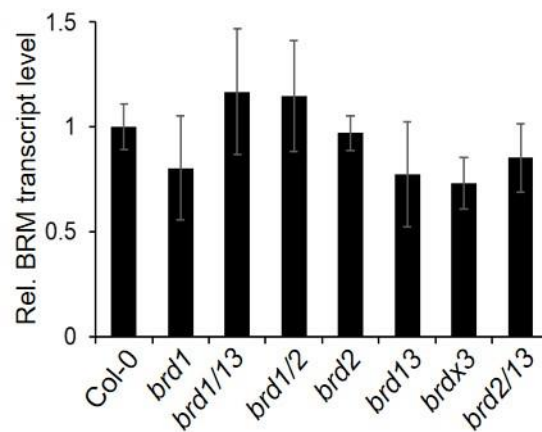

**Figure S5.** Quantitative RT-PCR analysis of BRM transcript levels in Col-0 wild-type and *brd* mutant lines. The *PP2A* housekeeping gene was used as normalization control. Means  $\pm$  SD from 3 biological replicates are shown. The transcript level in Col-0 is set to 1.

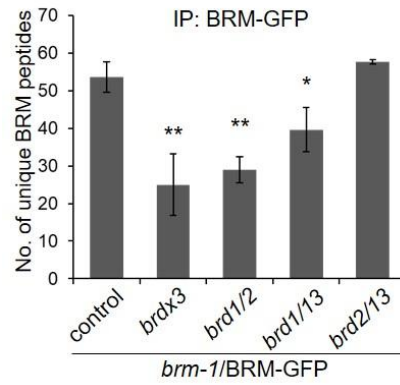

**Figure S6.** Mean number of BRM-derived peptides recovered by immunoprecipitation of BRM-GFP in the control and *brd* mutant lines. Means  $\pm$  SD are shown. Asterisks indicate significant differences from the control line (Student's t test, \* $P < 0.05$ , \*\* $P < 0.01$ ).

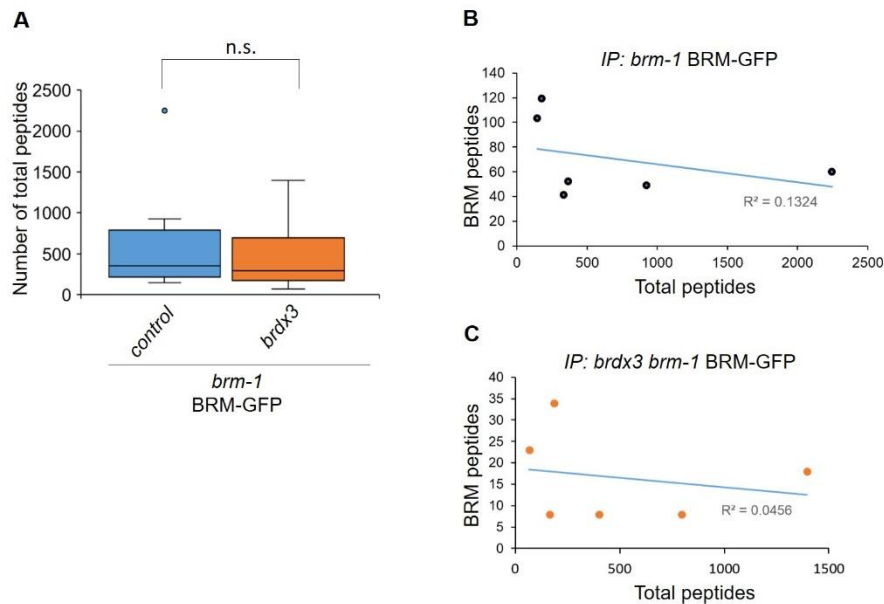

**Figure S7.** Comparison of total peptides and BRM-derived peptides detected in IP/MS experiments in the control line and *brdx3* mutant. **(A)** Mean number of total peptides. n.s., not significant (Student's t test). **(B, C)** The number of BRM-derived peptides does not correlate with the number of total peptides detected in the same experiments.

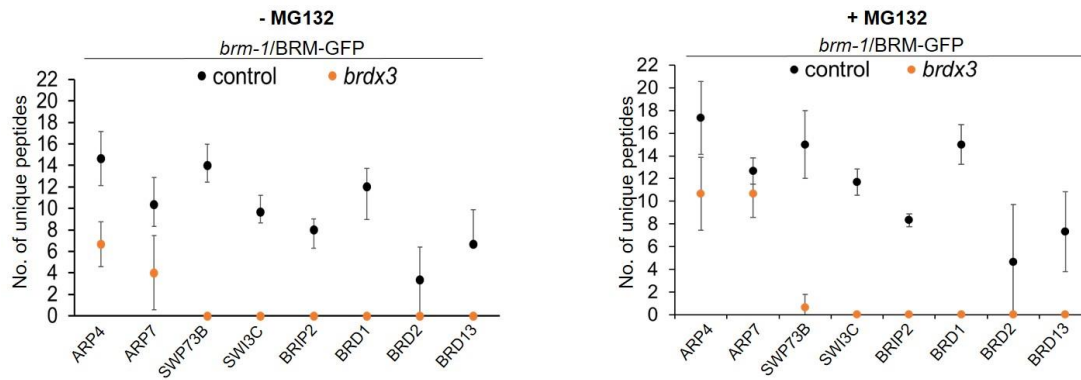

**Figure S8.** Peptides corresponding to the major subunits of the BRM complex identified in IP/MS experiments in the control and *brdx3* mutant. **(left)** Number of unique peptides recovered by immunoprecipitation of BRM-GFP in the control and *brdx3* mutant. **(right)** Number of unique peptides recovered by immunoprecipitation of BRM-GFP in the control and *brdx3* mutant after treatment with proteasome inhibitor MG132. Means  $\pm$  SD are shown.

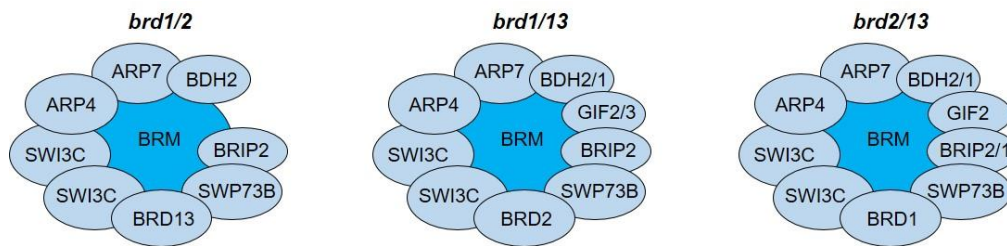

**Figure S9.** BRM complex assemblies purified from 2-week-old *brd* double mutants after treatment with MG132.

**Table S1** Defects of floral organs in *bdh* mutants compared to WT.

|                                                 | <b>WT</b> | <b><i>bdh1</i></b> | <b><i>bdh2</i></b> | <b><i>bdh1/2</i></b> |
|-------------------------------------------------|-----------|--------------------|--------------------|----------------------|
| <b>Mean number of stamens</b>                   | 6±0       | 5.8 ± 0.4          | 5.7 ± 0.7          | 5.2 ± 0.4            |
| <b>Flowers with decreased number of stamens</b> | 0 (0%)    | 5 (20%)            | 9 (36%)            | 19 (76%)             |
| <b>Flowers with increased number of stamens</b> | 0 (0%)    | 0 (0%)             | 3 (12%)            | 0 (0%)               |
| <b>N</b>                                        | 25        | 25                 | 25                 | 25                   |

**Table S2** Identification of SWI/SNF subunits in IP/MS experiments using BRM-GFP, SWP73B-YFP, BDH2-GFP, or BRD1-GFP as baits. The numbers of identifications are shown.

| <b>Protein name</b> | <b>Gene</b> | <b>IP:<br/>BRM-GFP</b> | <b>IP:<br/>SWP73-YFP</b> | <b>IP:<br/>BDH2-GFP</b> | <b>IP:<br/>BRD1-GFP</b> |
|---------------------|-------------|------------------------|--------------------------|-------------------------|-------------------------|
| BRM                 | AT2G46020   | 8/8                    | 2/2                      | 2/2                     | 2/2                     |
| SWI3C               | AT1G21700   | 8/8                    | 2/2                      | 2/2                     | 2/2                     |
| SWP73B              | AT5G14170   | 8/8                    | 2/2                      | 2/2                     | 2/2                     |
| SWP73A              | AT3G01890   | 2/8                    | -                        | 2/2                     | -                       |
| ARP7                | AT3G60830   | 8/8                    | 2/2                      | 2/2                     | 2/2                     |
| ARP4                | AT1G18450   | 8/8                    | 2/2                      | 2/2                     | 2/2                     |
| BRIP2               | AT5G17510   | 8/8                    | 2/2                      | 2/2                     | 2/2                     |
| BRIP1               | AT3G03460   | 2/8                    | -                        | -                       | -                       |
| BRD1                | AT1G20670   | 8/8                    | 2/2                      | 2/2                     | 2/2                     |
| BRD2                | AT1G76380   | 4/8                    | -                        | 2/2                     | -                       |
| BRD13               | AT5G55040   | 8/8                    | -                        | 2/2                     | -                       |
| BDH1                | AT4G22320   | 1/8                    | -                        | -                       | -                       |
| BDH2                | AT5G55210   | 4/8                    | -                        | 2/2                     | -                       |
| GIF1                | AT5G28640   | -                      | -                        | -                       | -                       |
| GIF2                | AT1G01160   | 1/8                    | -                        | 1/2                     | -                       |
| GIF3                | AT4G00850   | 1/8                    | -                        | 1/2                     | -                       |
| SYD                 | AT2G28290   | -                      | 2/2                      | 2/2                     | -                       |
| CHR12               | AT3G06010   | -                      | 1/2                      | 2/2                     | -                       |
| CHR23               | AT5G19310   | -                      | -                        | 2/2                     | -                       |
| SWI3A               | AT2G47620   | -                      | 1/2                      | 2/2                     | -                       |
| SWI3B               | AT2G33610   | -                      | 1/2                      | 2/2                     | -                       |
| SWI3D               | AT4G34430   | -                      | 2/2                      | 2/2                     | -                       |
| BSH                 | AT3G17590   | -                      | 1/2                      | 2/2                     | -                       |
| LFR                 | AT3G22990   | -                      | -                        | 2/2                     | -                       |
| TPF1                | AT3G52100   | -                      | -                        | 2/2                     | -                       |
| TPF2                | AT3G08020   | -                      | -                        | 1/2                     | -                       |
| OPF1                | AT1G50620   | -                      | -                        | 2/2                     | -                       |
| OPF2                | AT3G20280   | -                      | -                        | -                       | -                       |
| BRD5                | AT1G58025   | -                      | -                        | 2/2                     | -                       |
| PSA1                | AT1G32730   | -                      | -                        | 2/2                     | -                       |
| PSA2                | AT1G06500   | -                      | -                        | 1/2                     | -                       |
| SHH2                | AT3G18380   | -                      | -                        | -                       | -                       |

**Table S3.** Oligonucleotides used in this study.

| Name           | Sequence 5'-3'           | Note                                |
|----------------|--------------------------|-------------------------------------|
| SALK_012963-F  | ATCACCTCCTCAGGATCAAC     | Genotyping of <i>brd1-2</i> mutant  |
| SALK_012963-R  | AAGGTGAAGACAACGACGAT     |                                     |
| GK219B04-02kz  | TGAATTGTATTCCATTGCATTTGT | Genotyping of <i>brd1-5</i> mutant  |
| GK219B04-03kz  | TTGGAGTTGATGATGATGATCTGT |                                     |
| SALK_025965-R  | AATTAACGCGCCAAAATATC     | Genotyping of <i>brd2-1</i> mutant  |
| SALK_025965-F  | CGCTGTTGGTTTCATTGTTTC    |                                     |
| SALK_208635C-F | GTCACGCTGATTCTGAGGAAG    | Genotyping of <i>brd13-4</i> mutant |
| SALK_208635C-R | TGTATTGCATTGCATTTGAGC    |                                     |
| SALK_152173-F  | CGACCGGAGAGATCTAAATCC    | Genotyping of <i>bdh1-1</i> mutant  |
| SALK_152173-R  | ACTCCAAGGAATCAAAATGGC    |                                     |
| SALK_053046-F  | CGACAATTAACGATTAGTTTCGG  | Genotyping of <i>bdh1-2</i> mutant  |
| SALK_053046-R  | ACGACGAATCGTTTATCGTTG    |                                     |
| SALK_046333-F  | TCCTTGGAGTAACTGGACTGG    | Genotyping of <i>bdh1-3</i> mutant  |
| SALK_046333-R  | GGAGGTCAAAAAGTTCCCTTC    |                                     |
| SALK_060883-F  | TCAACAGCAAGCATTACATGG    | Genotyping of <i>bdh2-1</i> mutant  |
| SALK_060883-R  | TAACCGTCGCTGAGGTAAGTG    |                                     |
| SALK_042826-F  | GCTGCGTTTCGACTAATCAAC    | Genotyping of <i>bdh2-2</i> mutant  |
| SALK_042826-R  | CTCTGTACTTCCAGGGAAGCC    |                                     |
| SALK_029285-F  | ACACAAGACATGTCCAAAGGC    | Genotyping of <i>bdh2-3</i> mutant  |
| SALK_029285-R  | CAGTTTTTGCTTCCTGCAGAG    |                                     |
| Mut1L          | GATTTCCCAAATTCGATGC      | Genotyping of <i>brm-1</i> mutant   |
| Mut1R          | GGGCTCTATGCAAATGCCTCA    |                                     |
| Lba1           | TGGTTCACGTAGTGGGCCATCG   | Genotyping, T-DNA primer            |
| Lbb1           | GCGTGGACCGCTTGCTGCAACT   | Genotyping, T-DNA primer            |



|               |                                                        |                     |
|---------------|--------------------------------------------------------|---------------------|
| BDH1-RTF      | GGTAGGTCCTCGACACGGTAC                                  | RT-PCR              |
| BDH1-RTR      | GGCTTGCCTCTTTTCGGGTCG                                  |                     |
| BDH2-RTF      | ATGGAAGGTGTAGGATCGAG                                   | RT-PCR              |
| BDH2-RTR      | TCATTCTTCAGTCCCTTCAG                                   |                     |
| BDH1-qF       | GTGCGACAAGATTTGAACGA                                   | RT-PCR              |
| BDH1-qR       | CTAATGGCTTGCCTCTTTTCG                                  |                     |
| BDH2-qF       | TGGTAATTTGAATCTGGGACTGT                                | RT-PCR              |
| BDH2-qR       | GATCTAGAAGACGTCAAAGTGGA                                |                     |
| PP2A-F        | TATCGGATGACGATTCTTCGTGCAG                              | RT-qPCR             |
| PP2A-R        | GCTTGGTCGACTATCGGAATGAGAG                              |                     |
| BRM-qF        | TATCCTCCGGGTCTGG                                       | RT-qPCR             |
| BRM-qR        | CTCCGTTTCCGTTTTATCGT                                   |                     |
| BDH1cds-Fattb | GGGACAAGTTTGTACAAAAAAGCAGGCT<br>TCATGGAAGGAGTTGGTGCACG | Cloning of BDH1 cds |
| BDH1cds-Rattb | GGGACCACTTTGTACAAGAAAGCTGGGT<br>CTTCTTCTAATGGCTTGTC    |                     |
| BDH2cds-Fattb | GGGACAAGTTTGTACAAAAAAGCAGGCT<br>TCATGGAAGGTGTAGGATCGAG | Cloning of BDH2 cds |
| BDH2cds-Rattb | GGGACCACTTTGTACAAGAAAGCTGGGT<br>CTTCTTCAGTCCCTTCAG     |                     |
